# Supplementary material for: Impact of hemodialysis on the concentrations of sodium and potassium during infusion of sodium thiosulfate using an In Vitro hemodialysis model
Source: PubMed Central journal article supplement (PMC6853332; doi:10.1371/journal.pone.0224767), 2019-11-13
Supplement: pone.0224767.s001.pdf [file pone.0224767.s001.pdf]

**S1 Table. Sodium Thiosulfate Concentrations.** Sodium thiosulfate concentrations in the circulating blood surrogate solution.

| <b>Designation</b>            | <b>Blood Surrogate Solution Sodium Thiosulfate Concentration (µg/mL)</b> |
|-------------------------------|--------------------------------------------------------------------------|
| 0 Minute Pre-Filter Arterial  | 0                                                                        |
|                               | 0                                                                        |
|                               | 0                                                                        |
| 15 Minute Pre-Filter Arterial | 423.2                                                                    |
|                               | 413.5                                                                    |
|                               | 330.1                                                                    |
| 30 Minute Pre-Filter Arterial | 1198.5                                                                   |
|                               | 751.1                                                                    |
|                               | 1156.6                                                                   |
| 1 Hour Pre-Filter Arterial    | 1184.4                                                                   |
|                               | 662                                                                      |
|                               | 1089.7                                                                   |
|                               |                                                                          |
| 0 Minute Post-Filter Arterial | 0                                                                        |
|                               | 0                                                                        |
|                               | 0                                                                        |
| 15 Minute Post-Filter Venous  | 256.7                                                                    |
|                               | 37.4                                                                     |
|                               | 32.6                                                                     |
| 30 Minute Post-Filter Venous  | 186.6                                                                    |
|                               | 47                                                                       |
|                               | 85.5                                                                     |
| 1 Hour Post-Filter Venous     | 43.6                                                                     |
|                               | 43.6                                                                     |
|                               | 174.4                                                                    |
