# Supplementary material for: Impact of hemodialysis on the concentrations of sodium and potassium during infusion of sodium thiosulfate using an In Vitro hemodialysis model
Source: PubMed Central journal article supplement (PMC6853332; doi:10.1371/journal.pone.0224767), 2019-11-13
Supplement: pone.0224767.s002.pdf [file pone.0224767.s002.pdf]

**S2 Table. Sodium Concentrations.** Sodium concentrations in the circulating blood surrogate and dialysate solutions.

| <b>Designation</b>            | <b>Blood Surrogate Solution Sodium Concentration (mEq/L)</b> | <b>Designation</b>              | <b>Dialysate Solution Sodium Concentration (mEq/L)</b> |
|-------------------------------|--------------------------------------------------------------|---------------------------------|--------------------------------------------------------|
| 0 Minute Pre-Filter Arterial  | 81                                                           | 0 Minute Pre-Filter Dialysate   | 132.3                                                  |
|                               | 99.8                                                         |                                 | 97.1                                                   |
|                               | 84.7                                                         |                                 | 126.4                                                  |
| 15 Minute Pre-Filter Arterial | 101.2                                                        | 15 Minute Pre-Filter Dialysate  | 59.4                                                   |
|                               | 131.7                                                        |                                 | 87.6                                                   |
|                               | 64.9                                                         |                                 | 110.2                                                  |
| 30 Minute Pre-Filter Arterial | 133.4                                                        | 30 Minute Pre-Filter Dialysate  | 100.1                                                  |
|                               | 111.5                                                        |                                 | 83.6                                                   |
|                               | 117.8                                                        |                                 | 92.6                                                   |
| 1 Hour Pre-Filter Arterial    | 109.7                                                        | 1 Hour Pre-Filter Dialysate     | 105.7                                                  |
|                               | 70.2                                                         |                                 | 87.5                                                   |
|                               | 142.6                                                        |                                 | 99.1                                                   |
|                               |                                                              |                                 |                                                        |
| 0 Minute Post-Filter Venous   | 113.8                                                        | 0 Minute Post-Filter Dialysate  | 76                                                     |
|                               | 85                                                           |                                 | 144.2                                                  |
|                               | 110.9                                                        |                                 | 95.7                                                   |
| 15 Minute Post-Filter Venous  | 119.7                                                        | 15 Minute Post-Filter Dialysate | 140.3                                                  |
|                               | 86                                                           |                                 | 131.5                                                  |
|                               | 136.8                                                        |                                 | 121.8                                                  |
| 30 Minute Post-Filter Venous  | 119.8                                                        | 30 Minute Post-Filter Dialysate | 125.1                                                  |
|                               | 105.9                                                        |                                 | 110                                                    |
|                               | 125.9                                                        |                                 | 126.6                                                  |
| 1 Hour Post-Filter Venous     | 102.4                                                        | 1 Hour Post-Filter Dialysate    | 89.8                                                   |
|                               | 85.9                                                         |                                 | 146.4                                                  |
|                               | 92.2                                                         |                                 | 95.4                                                   |
