# Supplementary material for: Impact of hemodialysis on the concentrations of sodium and potassium during infusion of sodium thiosulfate using an In Vitro hemodialysis model
Source: PubMed Central journal article supplement (PMC6853332; doi:10.1371/journal.pone.0224767), 2019-11-13
Supplement: pone.0224767.s003.pdf [file pone.0224767.s003.pdf]

**S3 Table. Potassium Concentrations.** Potassium concentrations in the circulating blood surrogate and dialysate solutions.

| <b>Designation</b>            | <b>Blood Surrogate Solution Potassium Concentration (mEq/L)</b> | <b>Designation</b>              | <b>Dialysate Solution Potassium Concentration (mEq/L)</b> |
|-------------------------------|-----------------------------------------------------------------|---------------------------------|-----------------------------------------------------------|
| 0 Minute Pre-Filter Arterial  | 1.1                                                             | 0 Minute Pre-Filter Dialysate   | 1.8                                                       |
|                               | 1.3                                                             |                                 | 1.2                                                       |
|                               | 1                                                               |                                 | 1.7                                                       |
| 15 Minute Pre-Filter Arterial | 1.5                                                             | 15 Minute Pre-Filter Dialysate  | 0.6                                                       |
|                               | 1.8                                                             |                                 | 1                                                         |
|                               | 0.7                                                             |                                 | 1.4                                                       |
| 30 Minute Pre-Filter Arterial | 2                                                               | 30 Minute Pre-Filter Dialysate  | 1.2                                                       |
|                               | 1.5                                                             |                                 | 1                                                         |
|                               | 1.6                                                             |                                 | 1.1                                                       |
| 1 Hour Pre-Filter Arterial    | 1.6                                                             | 1 Hour Pre-Filter Dialysate     | 1.3                                                       |
|                               | 1                                                               |                                 | 1.1                                                       |
|                               | 2                                                               |                                 | 1.2                                                       |
|                               |                                                                 |                                 |                                                           |
| 0 Minute Post-Filter Venous   | 1.8                                                             | 0 Minute Post-Filter Dialysate  | 1                                                         |
|                               | 1                                                               |                                 | 1.9                                                       |
|                               | 1.4                                                             |                                 | 1.2                                                       |
| 15 Minute Post-Filter Venous  | 1.8                                                             | 15 Minute Post-Filter Dialysate | 1.9                                                       |
|                               | 1.1                                                             |                                 | 1.7                                                       |
|                               | 1.8                                                             |                                 | 1.6                                                       |
| 30 Minute Post-Filter Venous  | 1.6                                                             | 30 Minute Post-Filter Dialysate | 1.8                                                       |
|                               | 1.4                                                             |                                 | 1.4                                                       |
|                               | 1.6                                                             |                                 | 1.7                                                       |
| 1 Hour Post-Filter Venous     | 1.3                                                             | 1 Hour Post-Filter Dialysate    | 1.1                                                       |
|                               | 1.1                                                             |                                 | 2                                                         |
|                               | 1.1                                                             |                                 | 1.1                                                       |
